# Supplementary material for: Effect of Vitamin D3 Supplements on Development of Advanced Cancer: A Secondary Analysis of the VITAL Randomized Clinical Trial
Source: PubMed Central journal article supplement (PMC7675103; doi:10.1001/jamanetworkopen.2020.25850), 2020-11-18
Supplement: jamanetwopen-e2025850-s002.pdf [file jamanetwopen-e2025850-s002.pdf]

## Supplemental Online Content

Chandler PD, Chen WY, Ajala ON, et al; VITAL Research Group. Effect of vitamin D<sub>3</sub> supplements on development of advanced cancer: a secondary analysis of the VITAL randomized clinical trial. *JAMA Netw Open*. 2020;3(11):e2025850.  
doi:10.1001/jamanetworkopen.2020.25850

**eTable 1.** Hazard Ratios (HR) and 95% Confidence Intervals (CI) of Other Cancers by Randomized Vitamin D, All Years of Follow-up

**eTable 2.** Hazard Ratios (HR) and 95% Confidence Intervals (CI) of Specific Cancers and Mortality by Randomized Vitamin D

**eTable 3.** Randomized Vitamin D, Hazard Ratios (HR) and 95% Confidence Intervals (CI) for Total Metastatic and Cancer Mortality by Race

This supplemental material has been provided by the authors to give readers additional information about their work.

**eTable 1. Hazard Ratios (HR) and 95% Confidence Intervals (CI) of Other Cancers by Randomized Vitamin D, All Years of Follow-up<sup>a</sup>**

| Outcome                                | No of Events                |                    | HR   | 95%CI     | P-value |
|----------------------------------------|-----------------------------|--------------------|------|-----------|---------|
|                                        | Active Treatment (N=12,927) | Placebo (N=12,944) |      |           |         |
| <b>Confirmed Cancer + Cancer Death</b> |                             |                    |      |           |         |
| Bladder Cancer                         | 13                          | 23                 | 0.57 | 0.29-1.12 | 0.10    |
| Brain Cancer                           | 10                          | 11                 | 0.91 | 0.39-2.15 | 0.83    |
| Cervical Cancer                        | 2                           | 3                  | 0.67 | 0.11-4.01 | 0.66    |
| Esophageal Cancer                      | 10                          | 12                 | 0.84 | 0.36-1.95 | 0.69    |
| Other female genital                   | 2                           | 4                  | 0.50 | 0.09-2.73 | 0.43    |
| Pancreatic Cancer                      | 28                          | 32                 | 0.88 | 0.53-1.46 | 0.61    |
| Stomach Cancer                         | 13                          | 7                  | 1.86 | 0.74-4.67 | 0.18    |
| Thyroid Cancer                         | 10                          | 12                 | 0.83 | 0.36-1.93 | 0.67    |
| Uterine Cancer                         | 35                          | 20                 | 1.75 | 1.01-3.03 | 0.046   |
| Kidney Cancer                          | 18                          | 23                 | 0.78 | 0.42-1.45 | 0.44    |
| Leukemia Cancer                        | 22                          | 22                 | 1.00 | 0.56-1.81 | 0.99    |
| Liver Cancer                           | 7                           | 12                 | 0.59 | 0.23-1.49 | 0.26    |
| Lung Cancer                            | 74                          | 74                 | 1.00 | 0.73-1.38 | 0.99    |
| Lymphoma Cancer                        | 23                          | 32                 | 0.72 | 0.42-1.23 | 0.24    |
| Melanoma Cancer                        | 51                          | 53                 | 0.96 | 0.66-1.42 | 0.85    |
| Multiple Myeloma Cancer                | 10                          | 15                 | 0.67 | 0.30-1.49 | 0.33    |
| Ovarian Cancer                         | 8                           | 9                  | 0.89 | 0.34-2.31 | 0.81    |

<sup>a</sup>Analyses were from Cox regression models that were controlled for age, sex, and omega-3 fatty acid randomization group. Analyses were not adjusted for multiple comparisons. Analyses were done as intention-to-treat over all years of follow-up

**eTable 2. Hazard Ratios (HR) and 95% Confidence Intervals (CI) of Specific Cancers and Mortality by Randomized Vitamin D<sup>a</sup>**

| Disease Outcome                                        | No of Events         |                    | HR   | 95% CI    | P-value |
|--------------------------------------------------------|----------------------|--------------------|------|-----------|---------|
|                                                        | Vitamin D (N=12,927) | Placebo (N=12,944) |      |           |         |
| <b>Confirmed Metastatic Cancer</b>                     |                      |                    |      |           |         |
| Metastatic breast cancer                               | 2                    | 2                  | 1.00 | 0.14–7.09 | 1.00    |
| Metastatic prostate cancer                             | 3                    | 8                  | 0.38 | 0.10–1.42 | 0.15    |
| Metastatic colorectal cancer                           | 6                    | 4                  | 1.51 | 0.42–5.34 | 0.53    |
| <b>Death</b>                                           |                      |                    |      |           |         |
| Death from breast cancer                               | 6                    | 3                  | 2.00 | 0.50–7.99 | 0.33    |
| Death from prostate cancer                             | 3                    | 9                  | 0.34 | 0.09–1.24 | 0.10    |
| Death from colorectal cancer                           | 9                    | 14                 | 0.65 | 0.28–1.50 | 0.31    |
| <b>Confirmed Metastatic Cancer or Cancer</b>           |                      |                    |      |           |         |
| Metastatic breast cancer / breast cancer death         | 6                    | 4                  | 1.50 | 0.42–5.30 | 0.53    |
| Metastatic prostate cancer / prostate cancer death     | 6                    | 14                 | 0.43 | 0.17–1.12 | 0.09    |
| Metastatic colorectal cancer / colorectal cancer death | 12                   | 15                 | 0.81 | 0.38–1.73 | 0.58    |

<sup>a</sup>Analyses were from Cox regression models that were controlled for age, sex, and omega-3 fatty acid randomization group. Analyses were not adjusted for multiple comparisons. Analyses were done as intention-to-treat over all years of follow-up

**eTable 3. Randomized Vitamin D, Hazard Ratios (HR) and 95% Confidence Intervals (CI) for Total Metastatic and Cancer Mortality by Race<sup>a</sup>**

| Subgroup Category                                | Total         | No. Events in Groups |         | Hazard Ratio     |         | P-Interaction |
|--------------------------------------------------|---------------|----------------------|---------|------------------|---------|---------------|
|                                                  |               | Vitamin D            | Placebo | HR (95%CI)       | P-value | P-value       |
| <b>Total Metastatic Cancer/ Cancer Mortality</b> |               |                      |         |                  |         |               |
| <b>Race</b>                                      | <b>25,304</b> |                      |         |                  |         | 0.94          |
| Non-Hispanic White                               | 18,046        | 163                  | 205     | 0.80 (0.65–0.98) | 0.03    |               |
| Black                                            | 5,106         | 40                   | 46      | 0.86 (0.56–1.32) | 0.49    |               |
| Other                                            | 2,152         | 16                   | 19      | 0.86 (0.44-1.66) | 0.65    |               |
| <b>Total Metastatic Cancer</b>                   |               |                      |         |                  |         |               |
| <b>Race</b>                                      | <b>25,304</b> |                      |         |                  |         | 0.25          |
| Non-Hispanic White                               | 18,046        | 69                   | 91      | 0.76 (0.56–1.04) | 0.09    |               |
| Black                                            | 5,106         | 6                    | 13      | 0.46 (0.17–1.20) | 0.11    |               |
| Other                                            | 2,152         | 9                    | 6       | 1.50 (0.53-4.22) | 0.44    |               |
| <b>Cancer Mortality</b>                          |               |                      |         |                  |         |               |
| <b>Race</b>                                      | <b>25,304</b> |                      |         |                  |         | 0.40          |
| Non-Hispanic White                               | 18,046        | 106                  | 135     | 0.79 (0.61–1.02) | 0.07    |               |
| Black                                            | 5,106         | 37                   | 35      | 1.06 (0.67–1.68) | 0.81    |               |
| Other                                            | 2,152         | 8                    | 14      | 0.58 (0.24-1.38) | 0.22    |               |

<sup>a</sup>Analyses were from Cox regression models that were controlled for age, sex, and omega-3 fatty acid randomization group. Analyses were not adjusted for multiple comparisons. Analyses were done as intention-to-treat over all years of follow-up.
