# Supplementary material for: Effect of Vitamin D3 Supplements on Development of Advanced Cancer: A Secondary Analysis of the VITAL Randomized Clinical Trial
Source: PubMed Central journal article supplement (PMC7675103; doi:10.1001/jamanetworkopen.2020.25850), 2020-11-18
Supplement: jamanetwopen-e2025850-s003.pdf [file jamanetwopen-e2025850-s003.pdf]

# Data Sharing Statement

Chandler. Effect of Vitamin D<sub>3</sub> Supplements on Development of Advanced Cancer. *JAMA Netw Open*. Published November 18, 2020. 10.1001/jamanetworkopen.2020.25850

## Data

**Data available:** Yes

**Data types:** Deidentified participant data

**How to access data:** request for data must be sent to an individual. JoAnn E. Manson; [jmanson@partners.org](mailto:jmanson@partners.org)

**When available:** beginning date: 12-01-2021

## Supporting Documents

**Document types:** None

## Additional Information

**Who can access the data:** researchers whose proposed use of the data has been approved

**Types of analyses:** for a specified purpose

**Mechanisms of data availability:** with a signed data access agreement

**Any additional restrictions:** n/a
